# Supplementary material for: A stereoselective synthesis of the reported structure of polyporolide
Source: Royal Society of Chemistry journal article supplement (doi:10.1039/c5ra07930f), 2015-01-01

## Supporting Information

### A Stereoselective Synthesis of the Reported Structure of Polyporolide

Pradnya H. Patil and Rodney A. Fernandes\*

*Department of Chemistry, Indian Institute of Technology Bombay, Powai,*

*Mumbai 400076, Maharashtra, India*

*Email: rfernand@chem.iitb.ac.in*

Copies of  $^1\text{H}$  and  $^{13}\text{C}$  NMR spectra for all the compounds .....S2–S11

**<sup>1</sup>H NMR (400 MHz, CDCl<sub>3</sub>) and <sup>13</sup>C NMR (100 MHz, CDCl<sub>3</sub>) of compound 3**

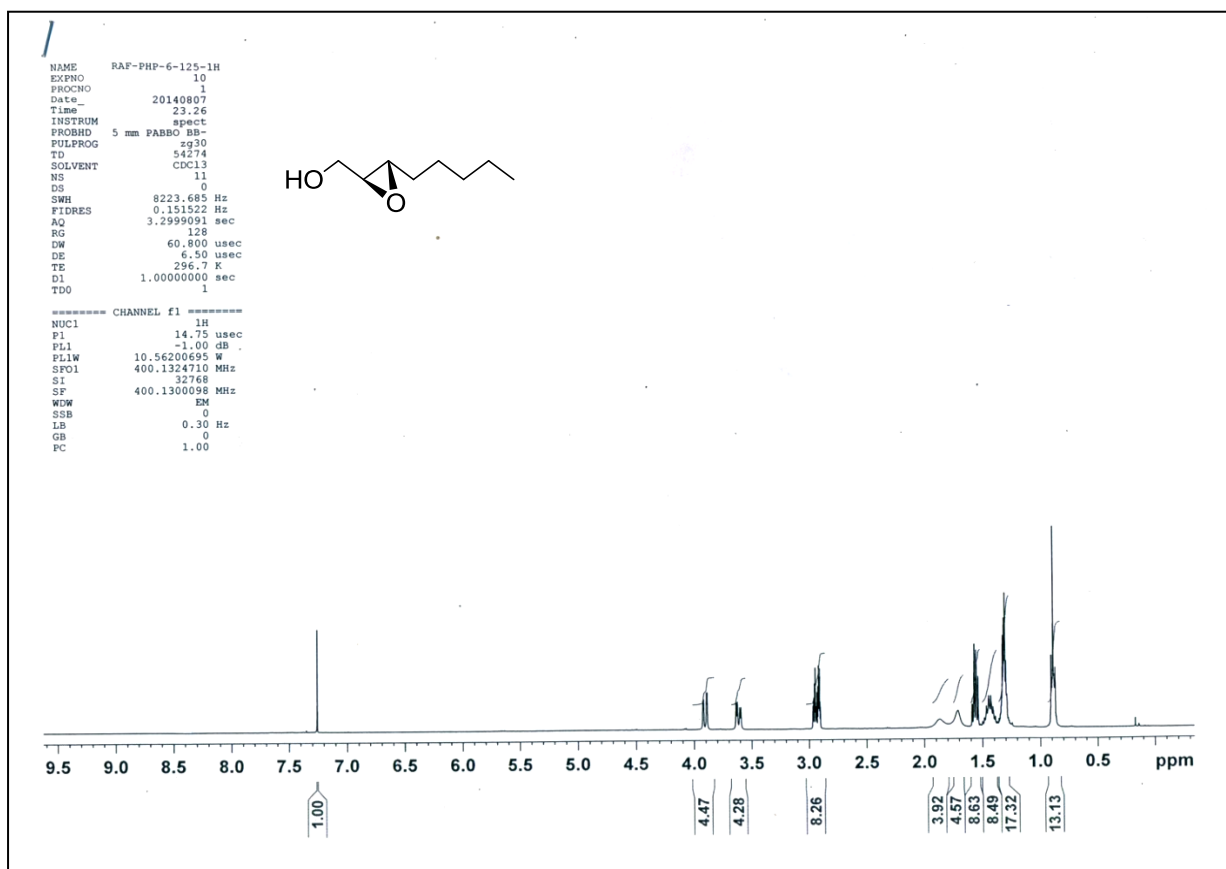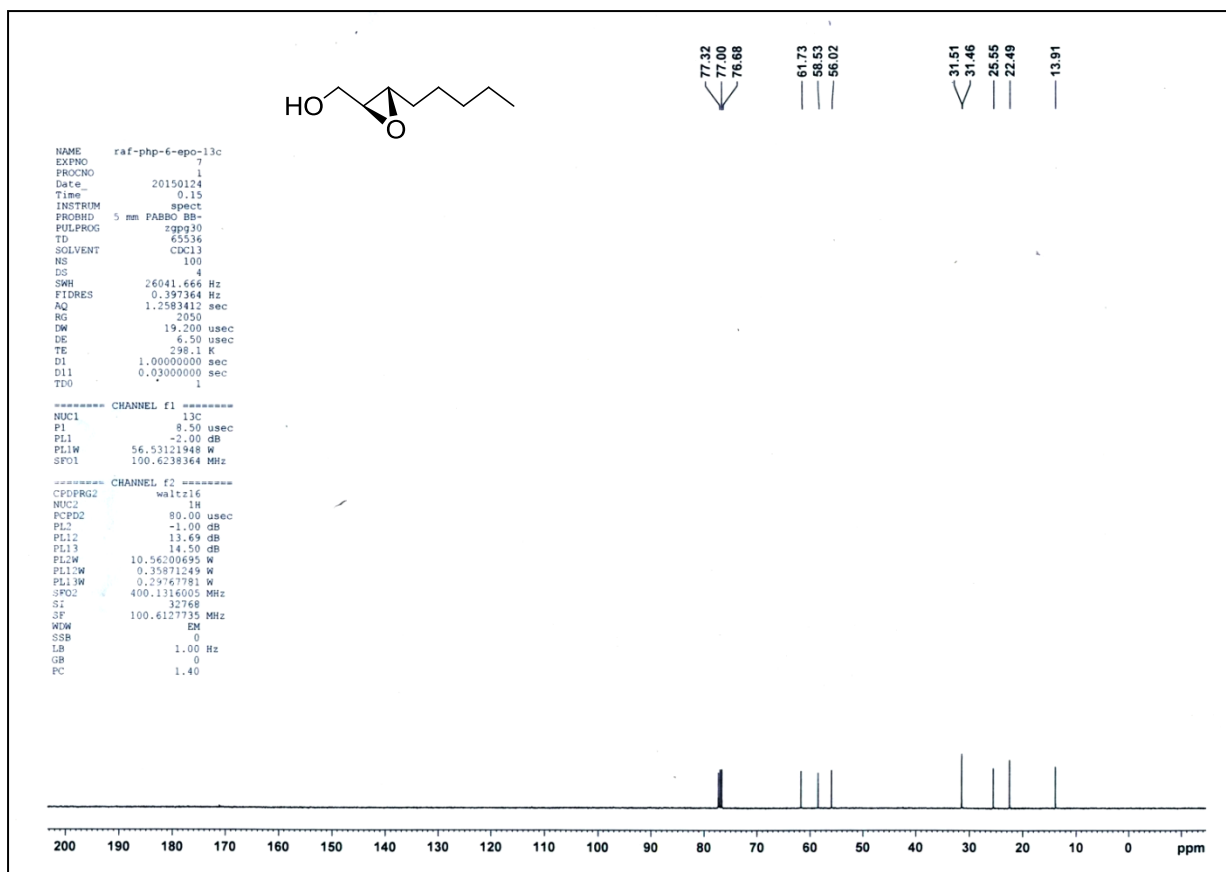

<sup>1</sup>H NMR (400 MHz, Acetone-d6) and <sup>13</sup>C NMR (125 MHz, Acetone-d6) of compound 7

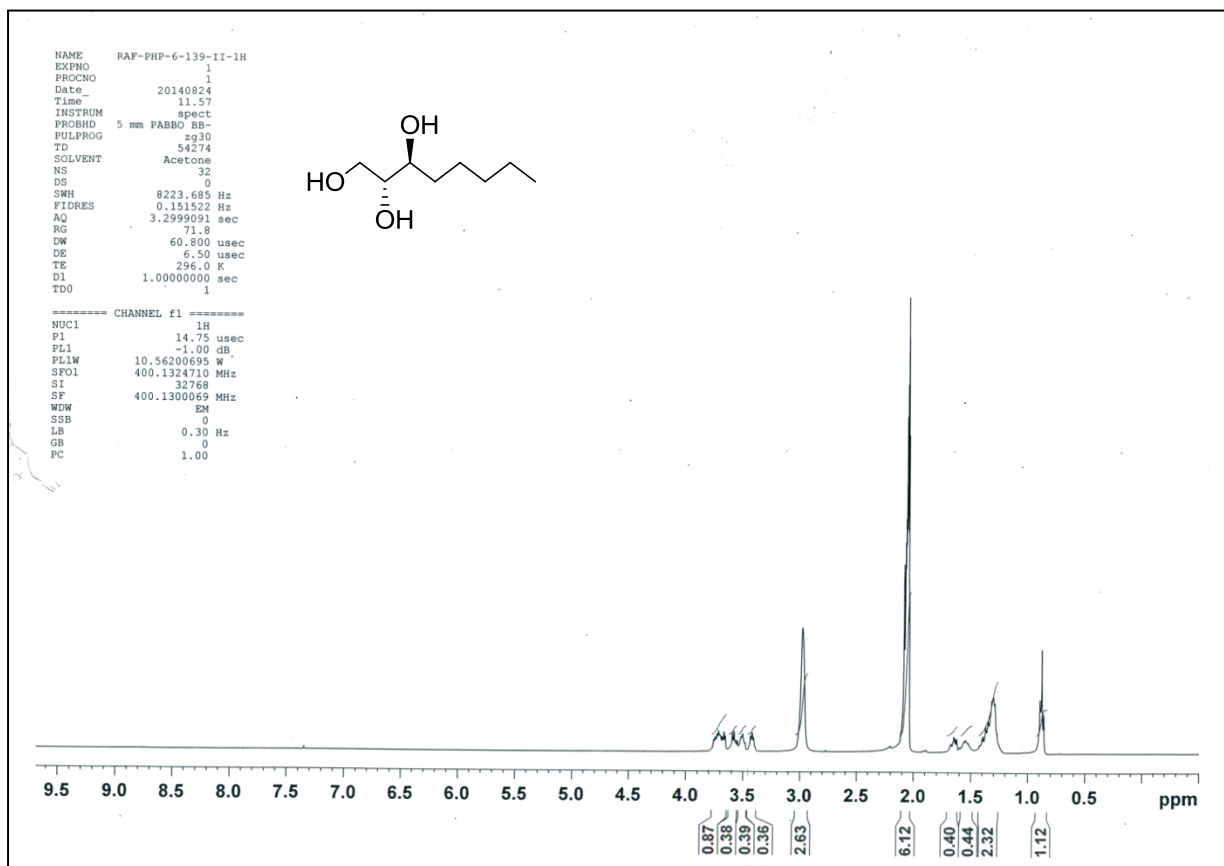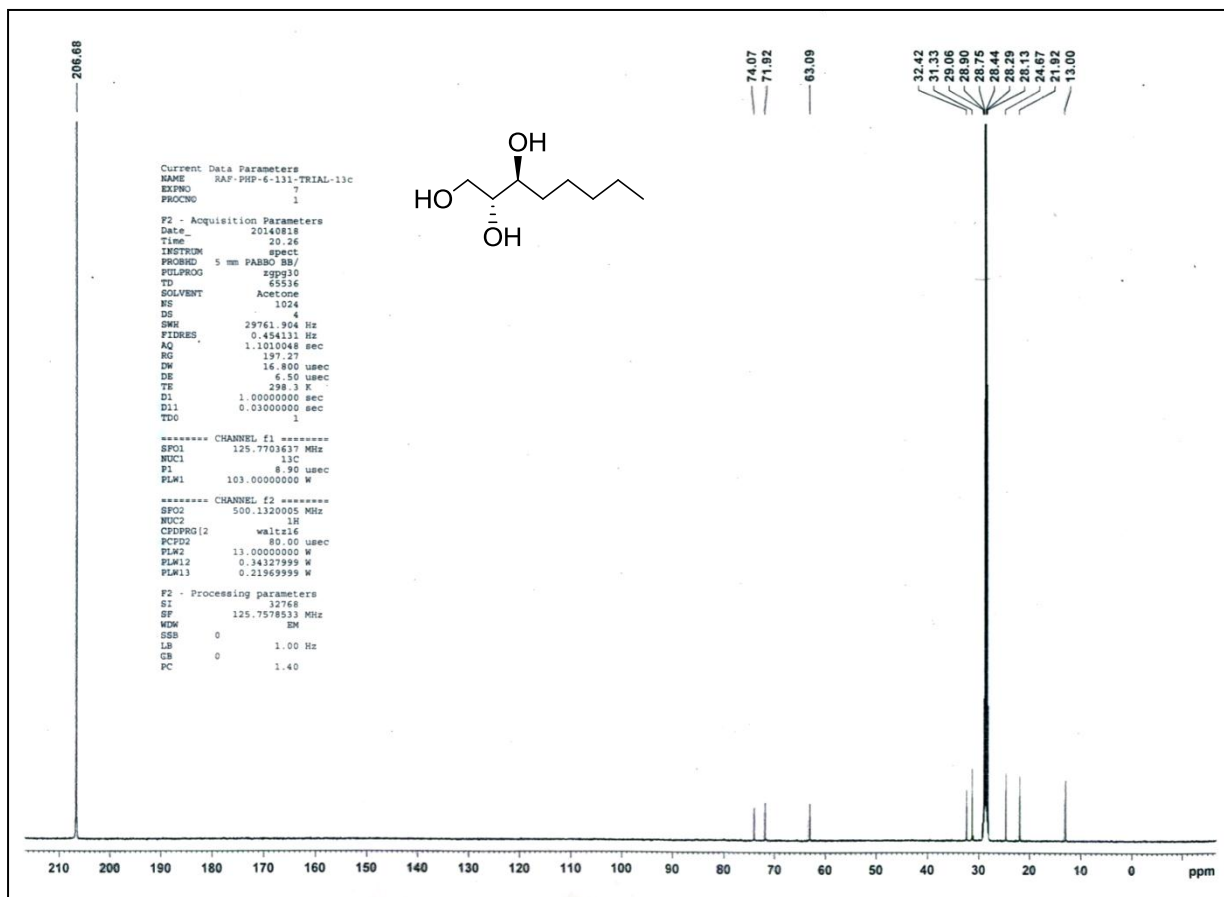

<sup>1</sup>H NMR (400 MHz, CDCl<sub>3</sub>) and <sup>13</sup>C NMR (100 MHz, CDCl<sub>3</sub>) of compound 8

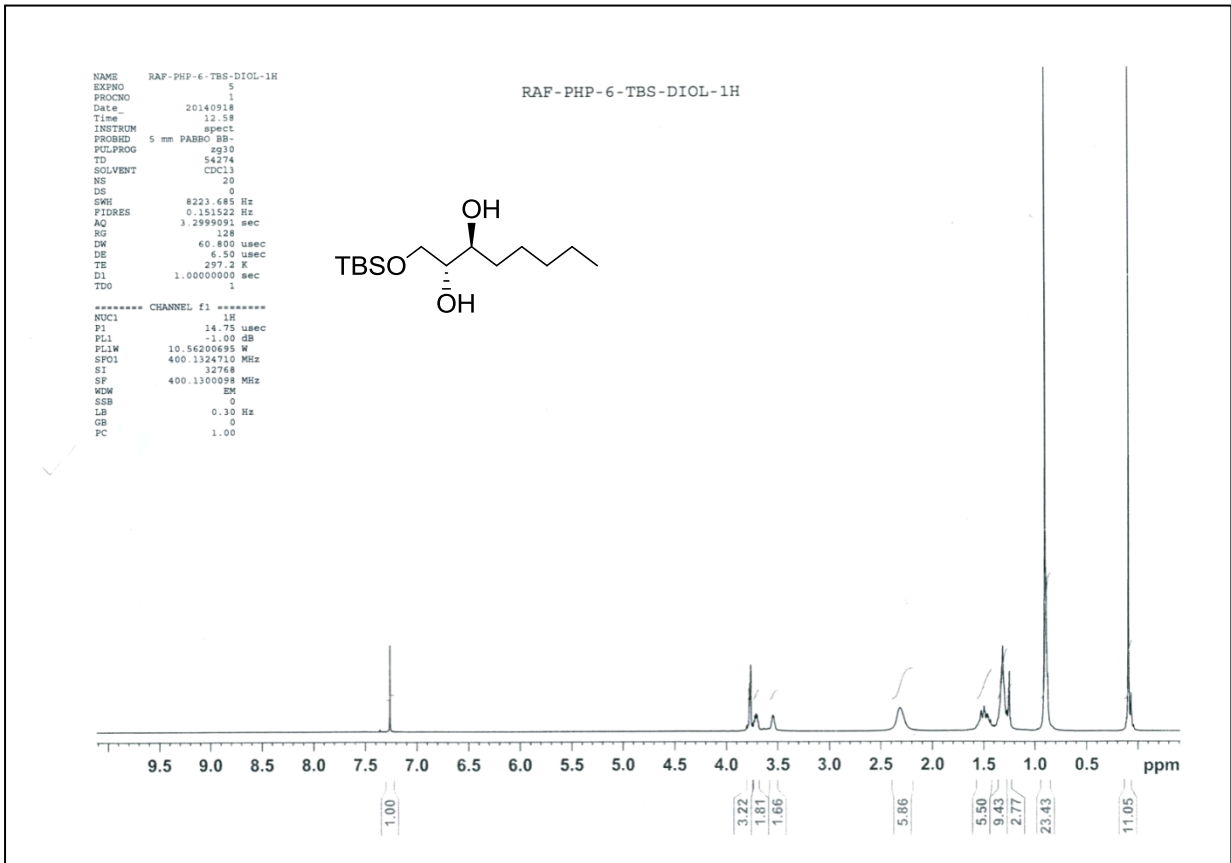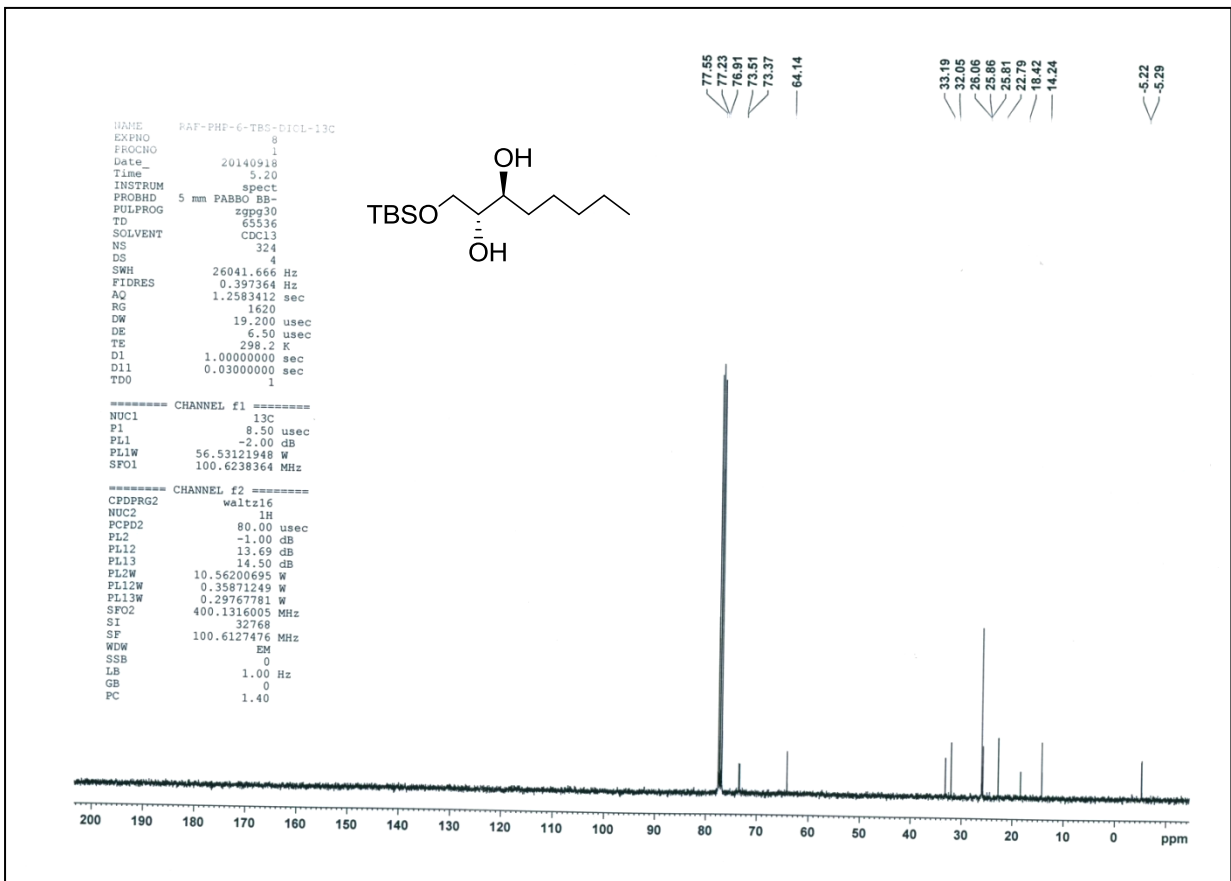

<sup>1</sup>H NMR (400 MHz, CDCl<sub>3</sub>) and <sup>13</sup>C NMR (100 MHz, CDCl<sub>3</sub>) of compound 9

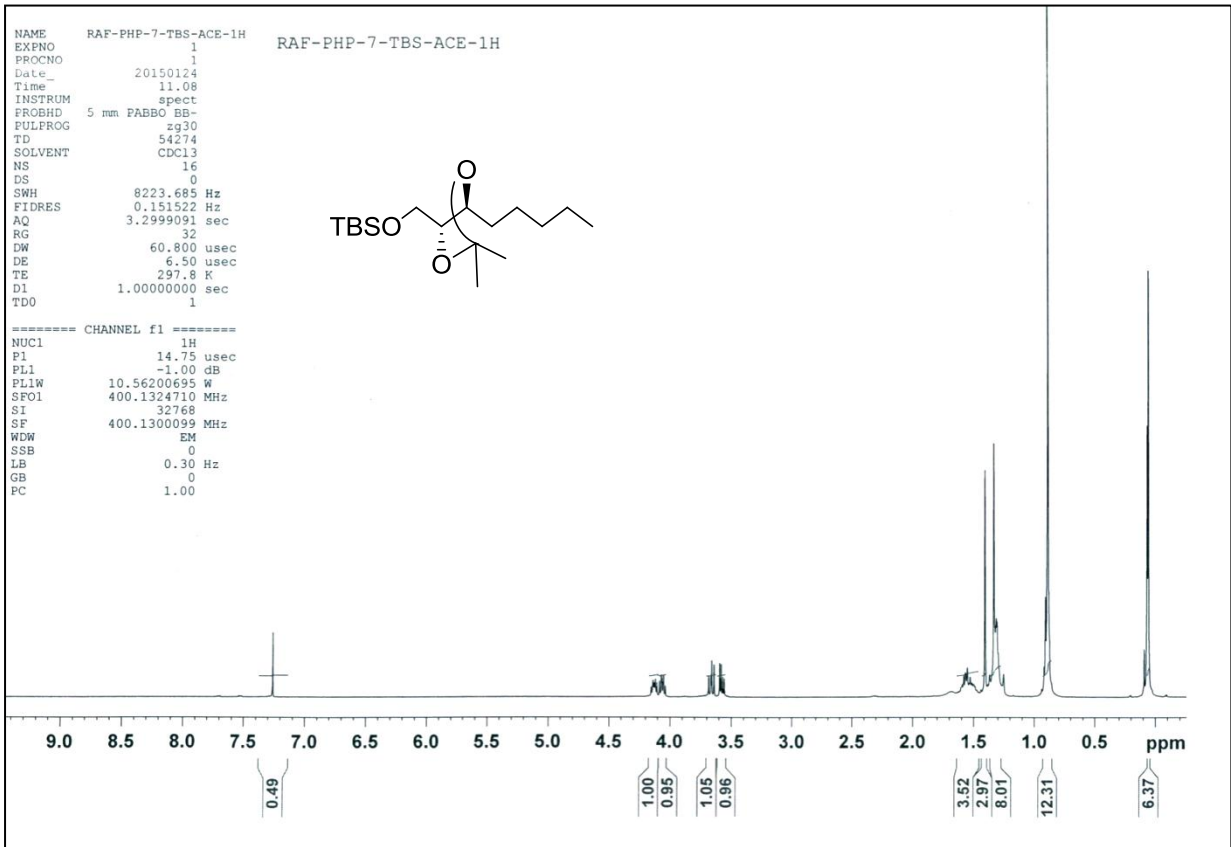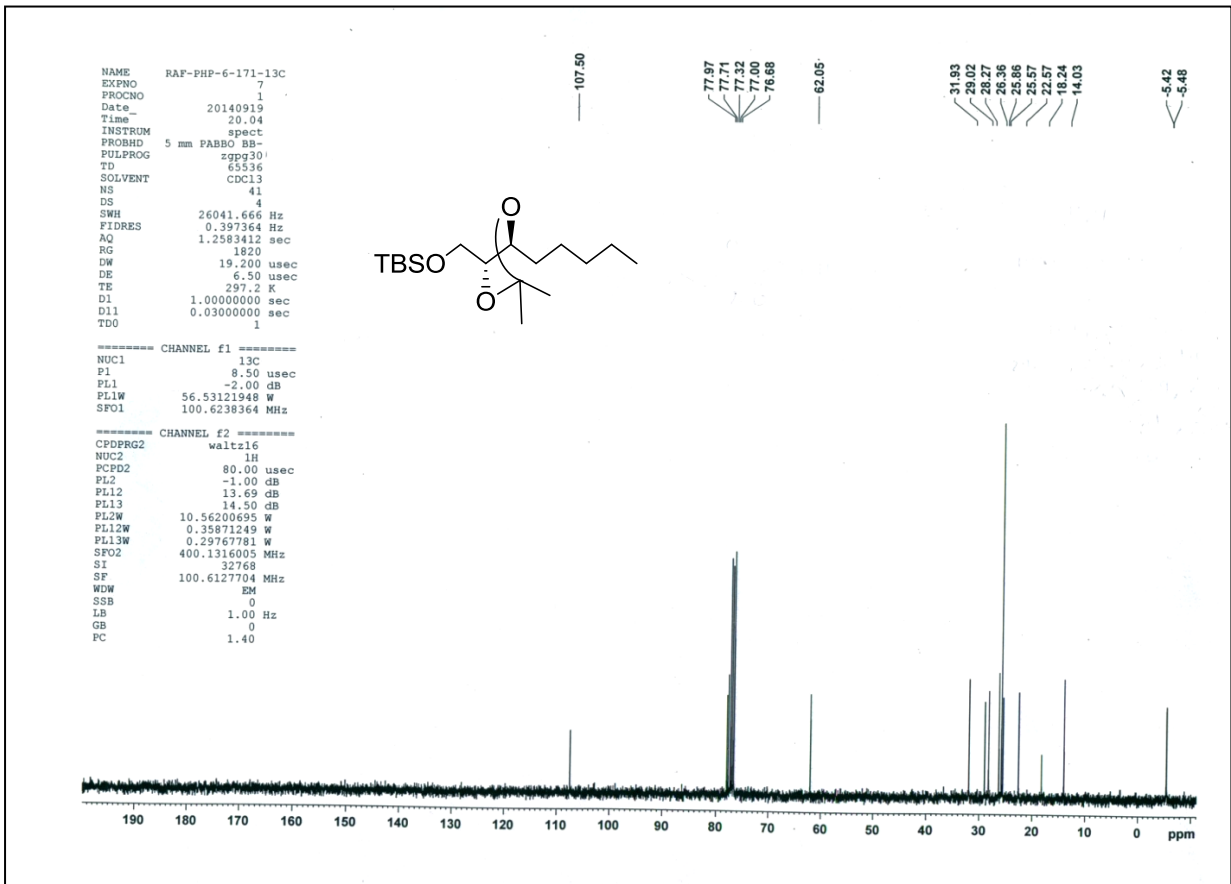

<sup>1</sup>H NMR (500 MHz, CDCl<sub>3</sub>) and <sup>13</sup>C NMR (125 MHz, CDCl<sub>3</sub>) of compound 2

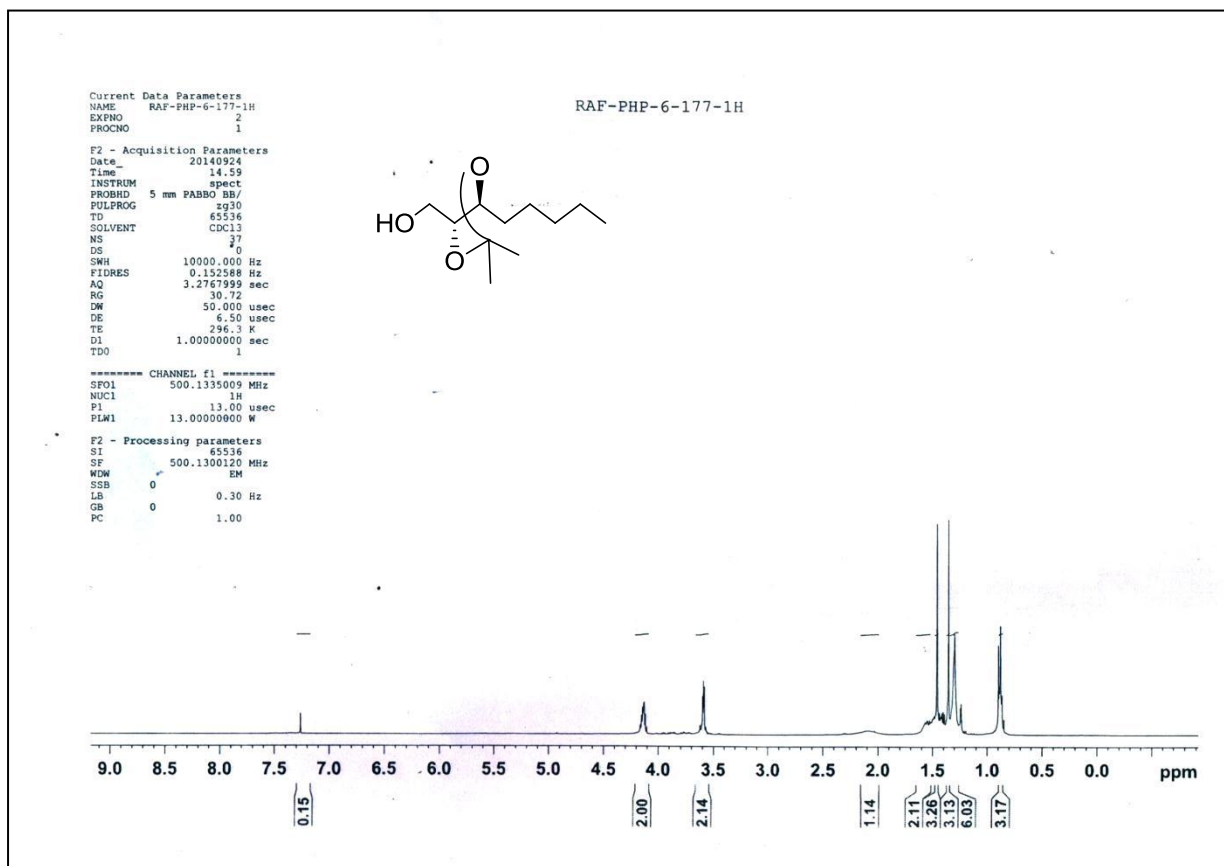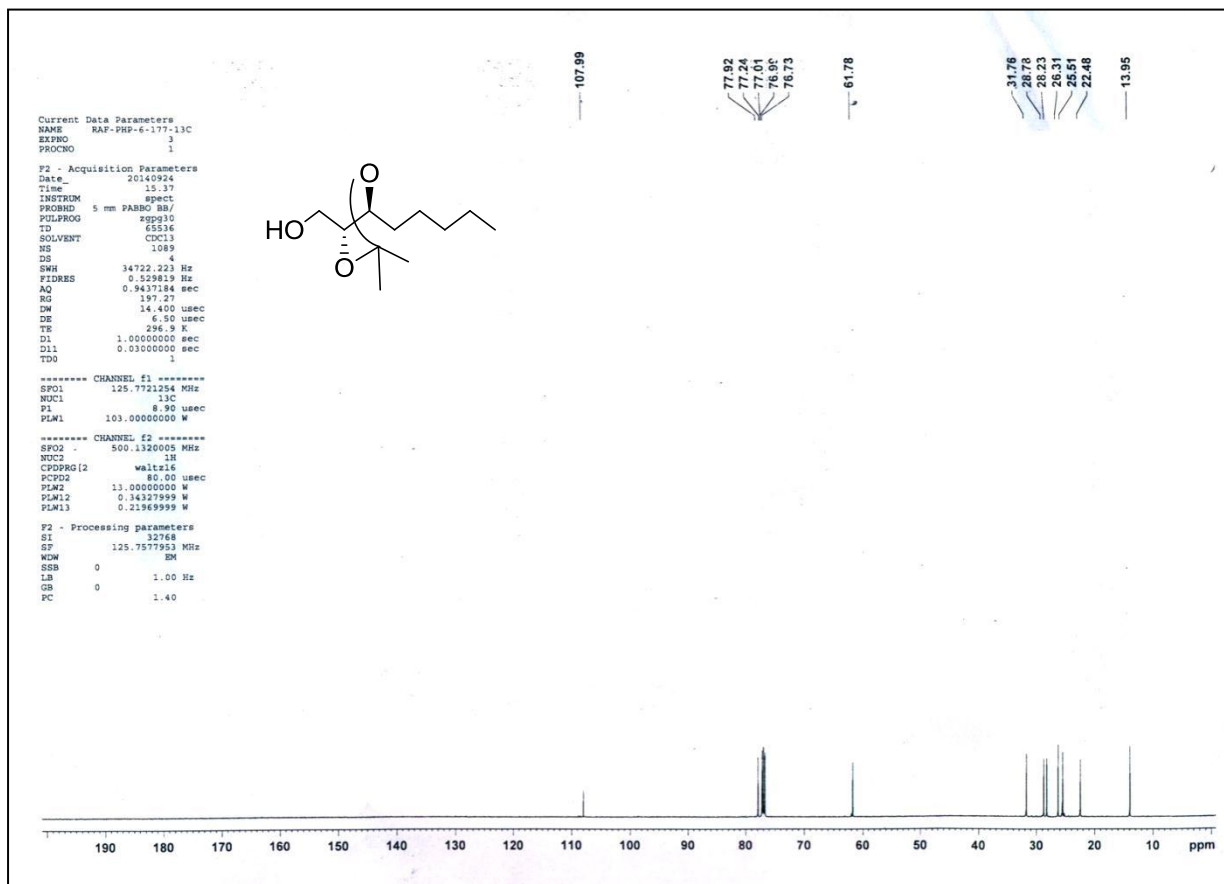

<sup>1</sup>H NMR (400 MHz, CDCl<sub>3</sub>) and <sup>13</sup>C NMR (100 MHz, CDCl<sub>3</sub>) of compound 10

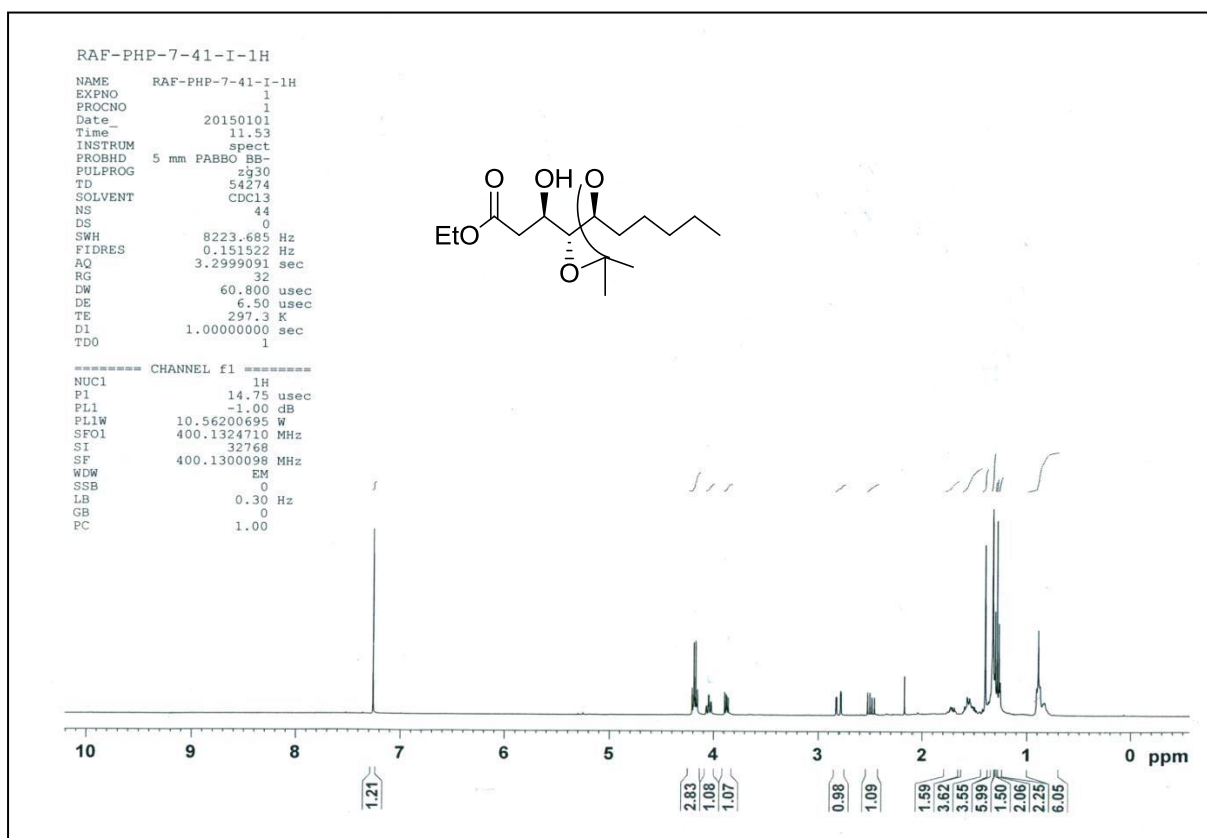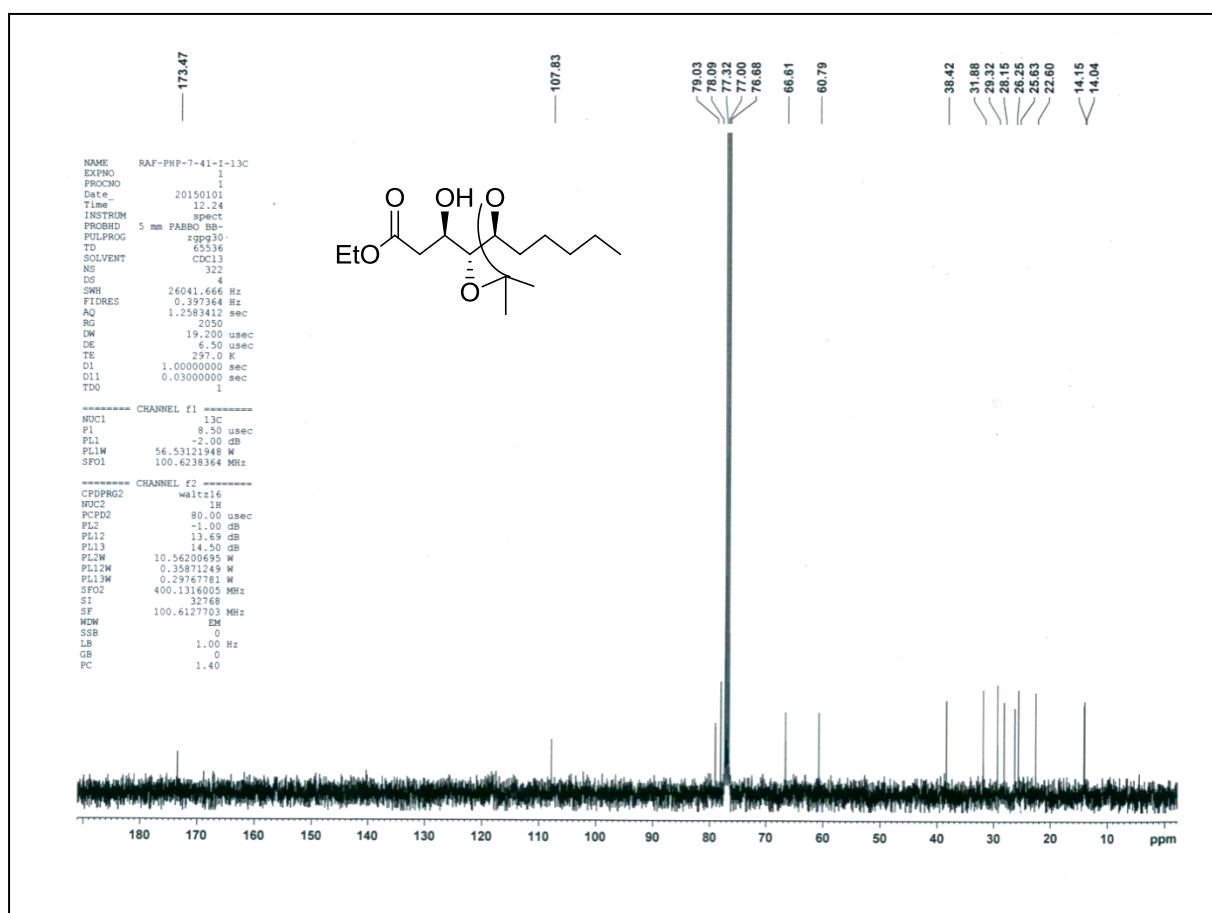

<sup>1</sup>H NMR (500 MHz, CDCl<sub>3</sub>) and <sup>13</sup>C NMR (100 MHz, CDCl<sub>3</sub>) of compound 1

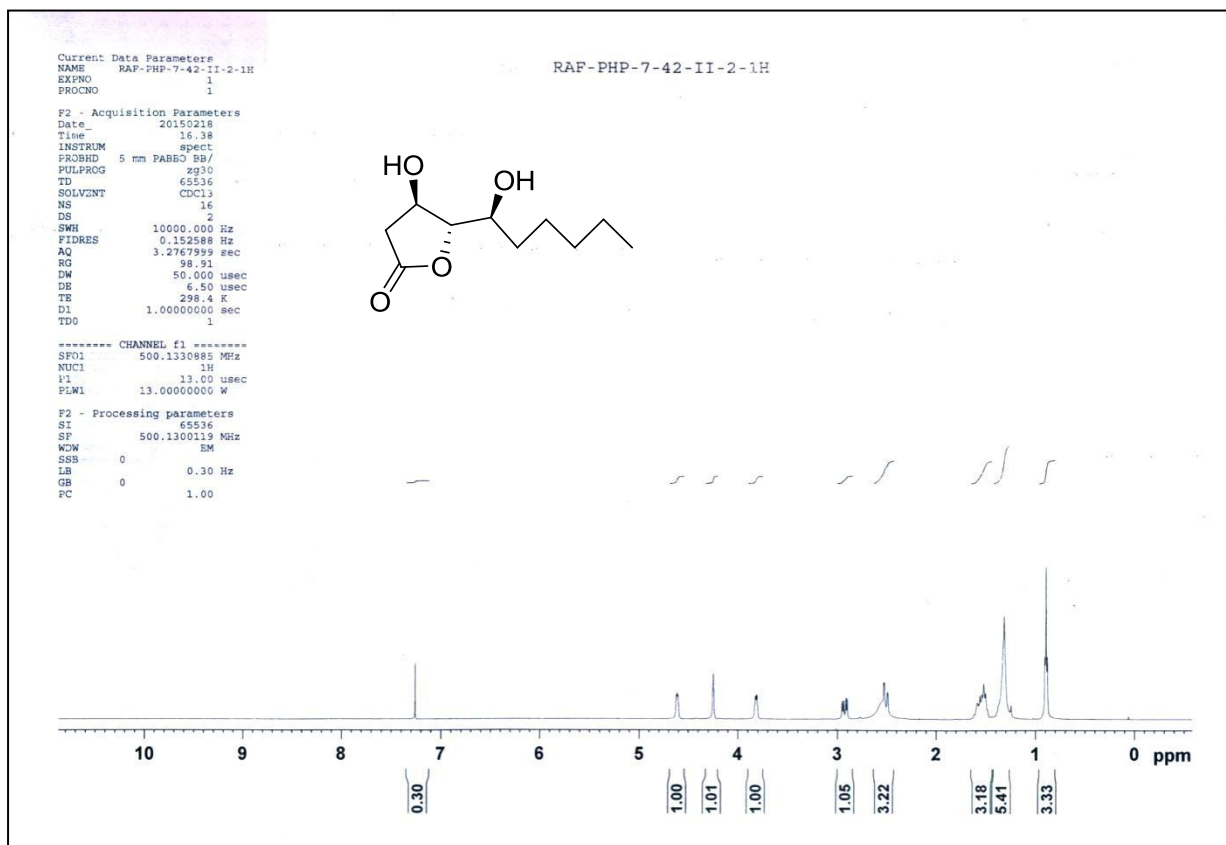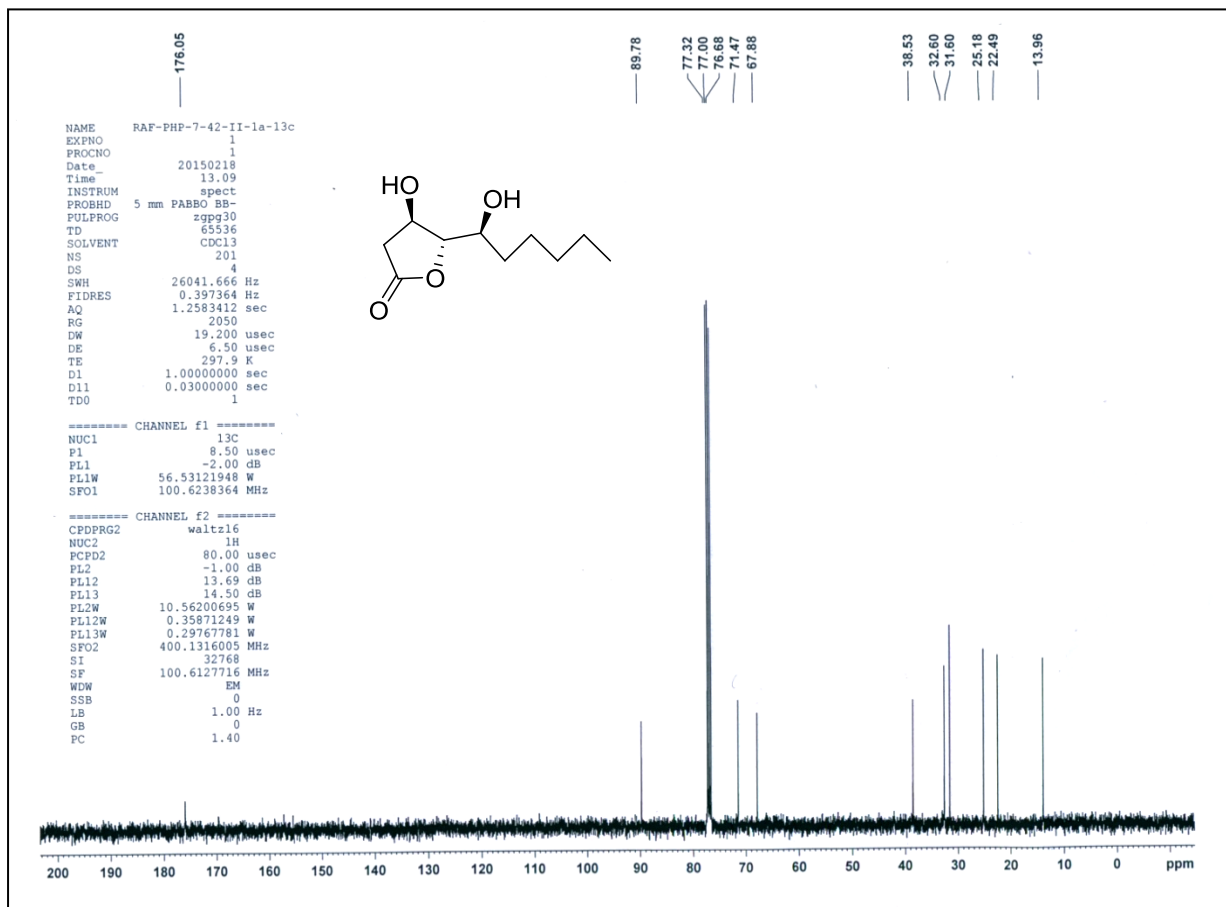



**<sup>1</sup>H NMR (400 MHz, CDCl<sub>3</sub>) and <sup>13</sup>C NMR (100 MHz, CDCl<sub>3</sub>) of compound 5**

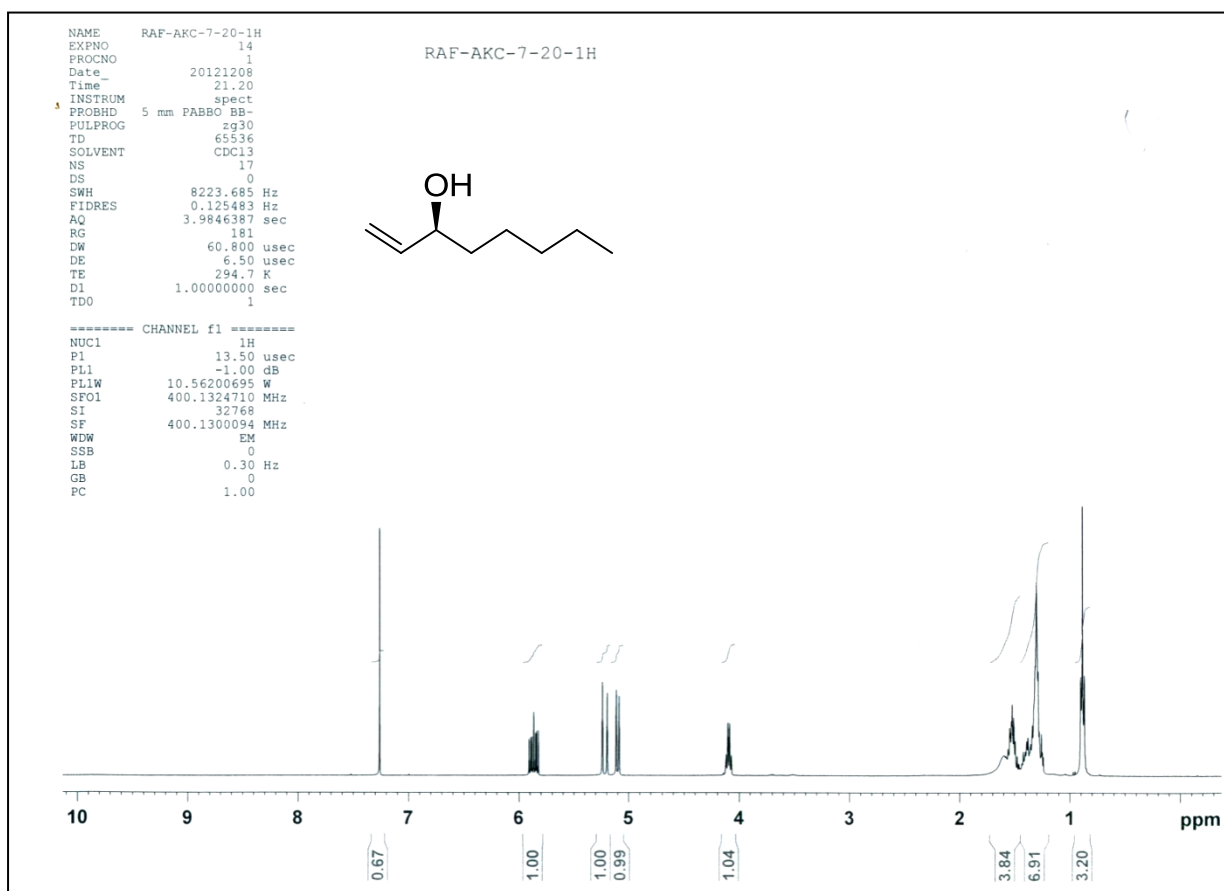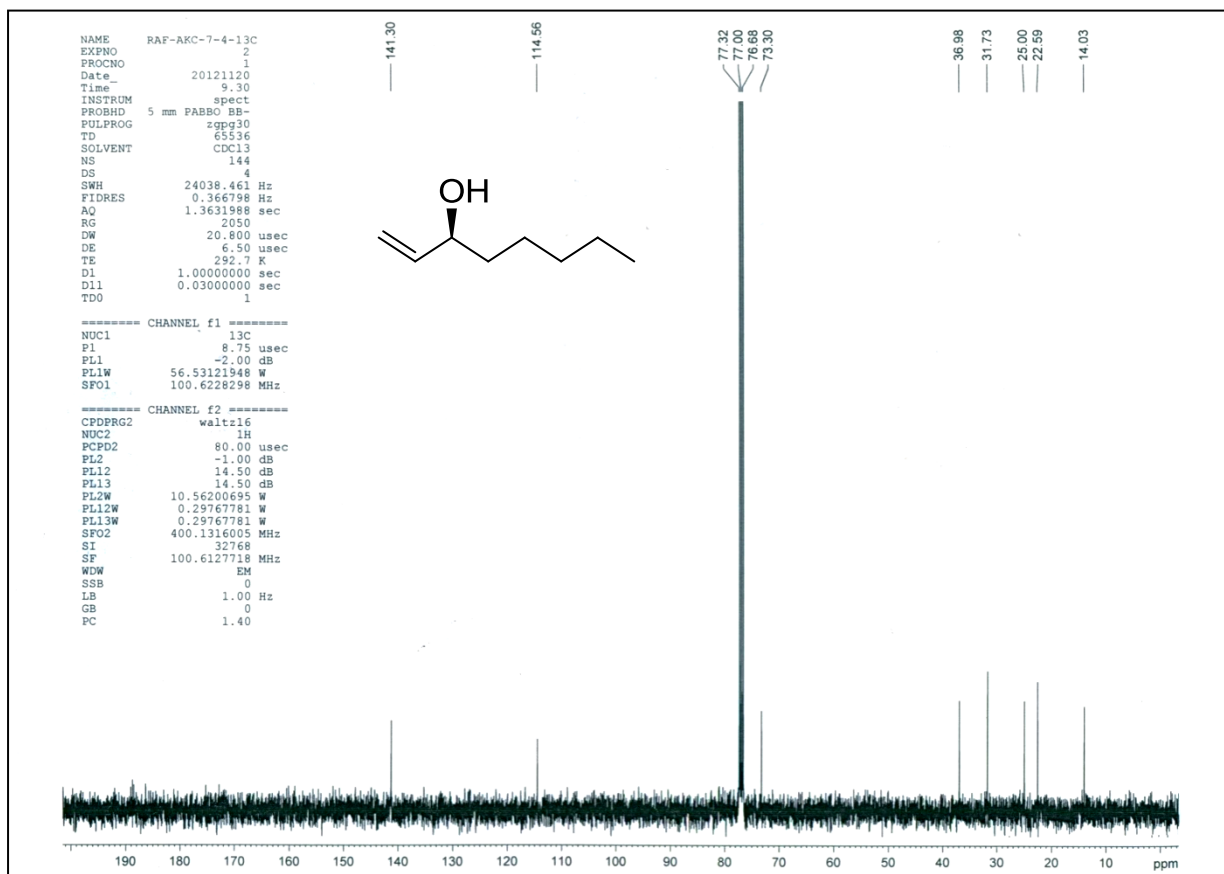

<sup>1</sup>H NMR (400 MHz, CDCl<sub>3</sub>) and <sup>13</sup>C NMR (100 MHz, CDCl<sub>3</sub>) of compound 12

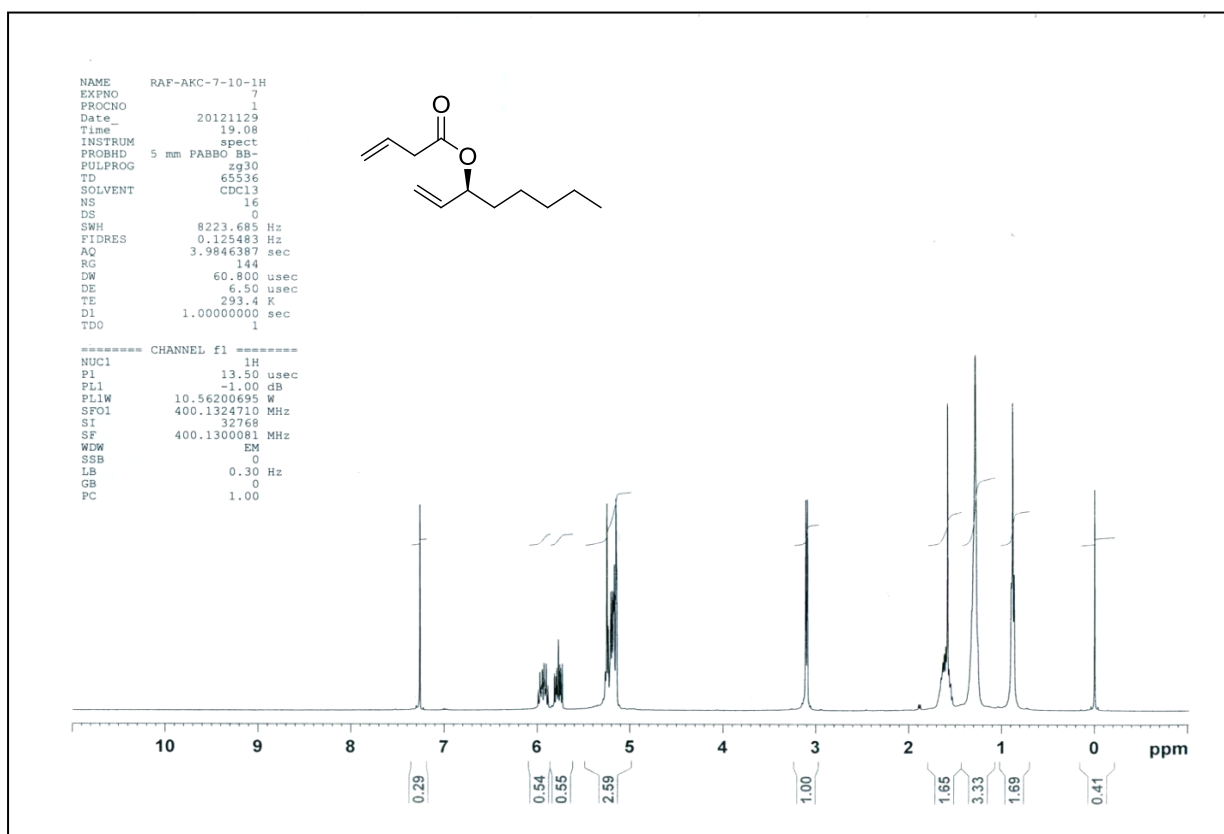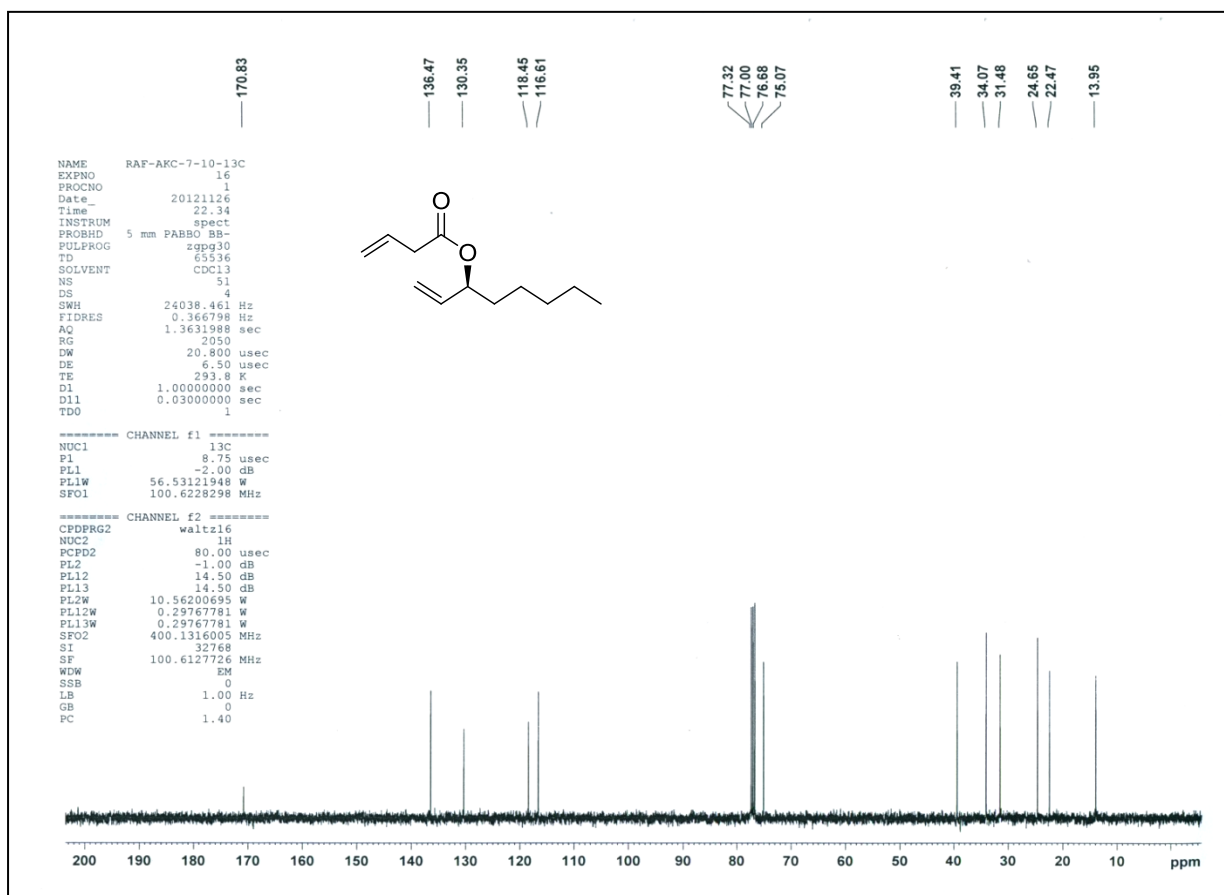

<sup>1</sup>H NMR (400 MHz, CDCl<sub>3</sub>) and <sup>13</sup>C NMR (100 MHz, CDCl<sub>3</sub>) of compound 4

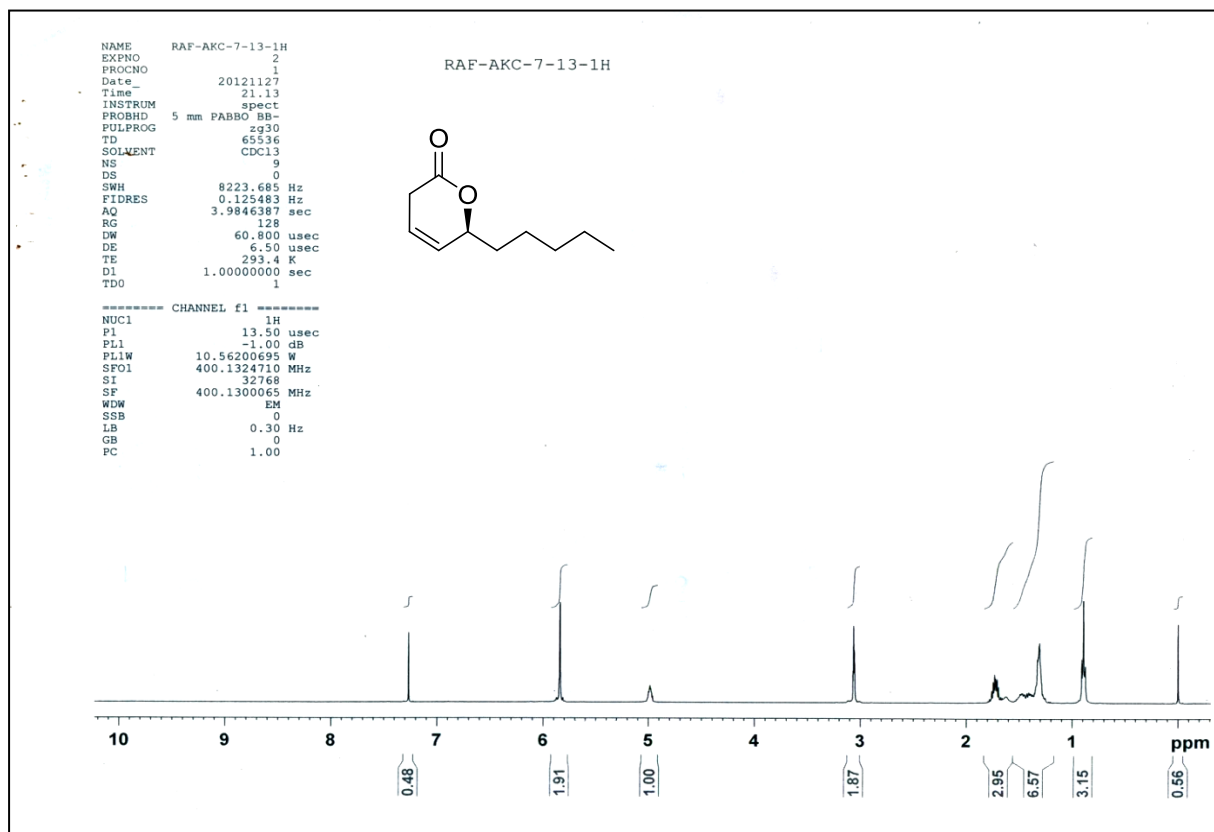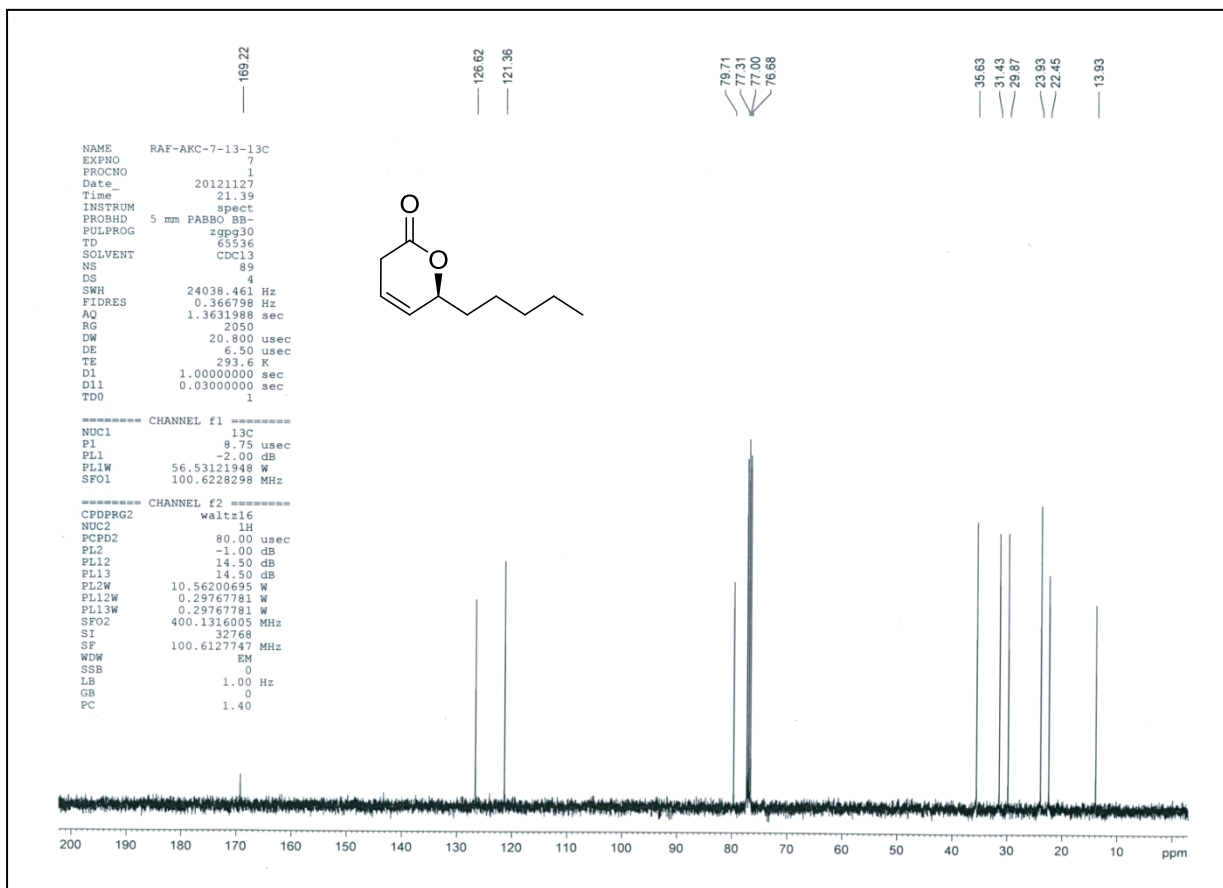

Supplement: c5ra07930f1.pdf [file c5ra07930f1.pdf]
